# Supplementary material for: A Ce-MOF as an alkaline phosphatase mimic: Ce-OH2 sites in catalytic dephosphorylation
Source: Royal Society of Chemistry journal article supplement (doi:10.1039/d2qi01443b), 2022-01-01
Supplement: d2qi01443b1.pdf [file d2qi01443b1.pdf]

## **Supporting Information**

### **Cerium-organic framework as alkaline phosphatase mimics: Ce-OH<sub>2</sub> sites in catalytic dephosphorylation**

Sudip Bhattacharjee,<sup>a,†</sup> Tonmoy Chakraborty,<sup>a,†</sup> and Asim Bhaumik<sup>a,\*</sup>

*<sup>a</sup>School of Materials Sciences, Indian Association for the Cultivation of Science, 2A & 2B  
Raja S. C. Mullick Road, Jadavpur, Kolkata 700032, India.*

Email: msab@iacs.res.in

<sup>†</sup>SB and TC contributed equally to this paper.

| <b>Sl No.</b> | <b>Contents</b>                                                                                                | <b>Page No.</b> |
|---------------|----------------------------------------------------------------------------------------------------------------|-----------------|
| 1.            | Various coordination mode of PDA ligand with Ce metal ( <b>Figure S1</b> )                                     | S4              |
| 2.            | Topological representation of Ce-MOF underlying net 4,4,6,6T3 ( <b>Figure S2</b> )                             | S4              |
| 3.            | Coordination bond length and angles of Ce-MOF crystal ( <b>Table S1-S2</b> )                                   | S5-S9           |
| 4.            | PXRD pattern of Ce-MOF at different solvent medium ( <b>Figure S3</b> )                                        | S9              |
| 5.            | FT-IR of Ce-MOF at different solvent medium ( <b>Figure S4</b> )                                               | S9              |
| 6.            | XPS analysis of Ce-MOF ( <b>Figure S5</b> )                                                                    | S10             |
| 7.            | TGA plot of Ce-MOF ( <b>Figure S6</b> )                                                                        | S10             |
| 8.            | Energy dispersive X-ray (EDX) spectrum of Ce-MOF ( <b>Figure S7</b> )                                          | S11             |
| 9.            | Color change of 4-NPP hydrolysis reaction over time ( <b>Figure S8</b> )                                       | S11             |
| 10.           | Wavelength scan for the hydrolysis of 4-NPP in the presence of Ce-MOF in different buffer ( <b>Figure S9</b> ) | S12             |
| 11.           | PXRD pattern of Ce-MOF at different pH ( <b>Figure S10</b> )                                                   | S13             |
| 12.           | FT-IR spectra of Ce-MOF in different pH medium ( <b>Figure S11</b> )                                           | S13             |
| 13.           | Comparison of hydrolysis rate of 4-NPP with various catalysts ( <b>Table S3</b> )                              | S14             |
| 14.           | SEM images of Ce-MOF (a) before and (b) after catalysis ( <b>Figure S12</b> )                                  | S14             |
| 15.           | PXRD of Ce-MOF after and before catalysis ( <b>Figure S13</b> )                                                | S14             |
| 16.           | FT-IR of Ce-MOF after and before catalysis ( <b>Figure S14</b> )                                               | S15             |
| 17.           | A pictorial diagram of the 4-NPP catalytic hydrolytic reaction with                                            | S15             |

|            |                                                                                                             |     |
|------------|-------------------------------------------------------------------------------------------------------------|-----|
|            | the surface H <sub>2</sub> O molecules of the Ce-MOF catalyst ( <b>Figure S15</b> )                         |     |
| <b>18.</b> | Previously reported $K_{cat}$ values for the hydrolysis of 4-NPP by different catalysts ( <b>Table S4</b> ) | S16 |

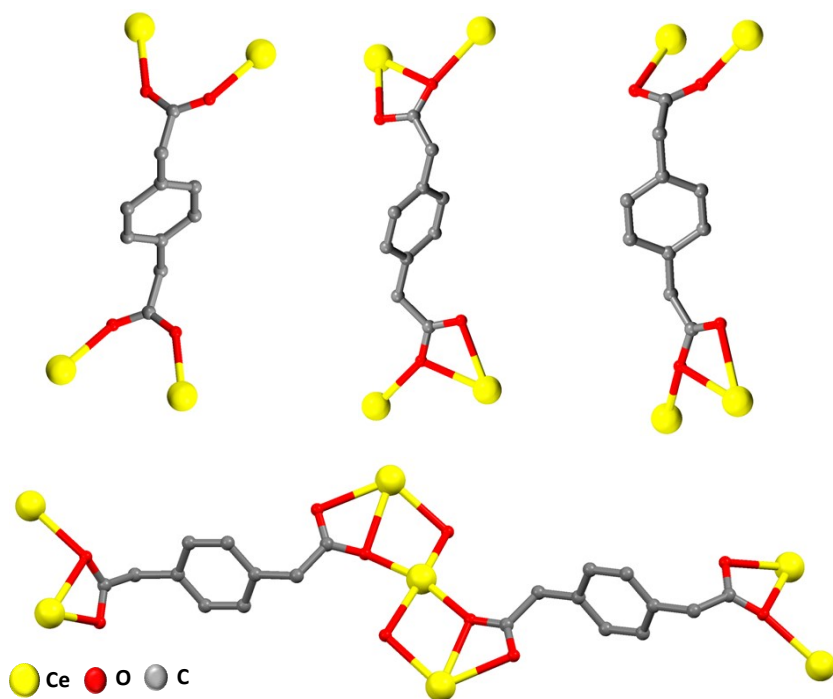

**Figure S1.** Various coordination mode of PDA ligand with Ce metal.

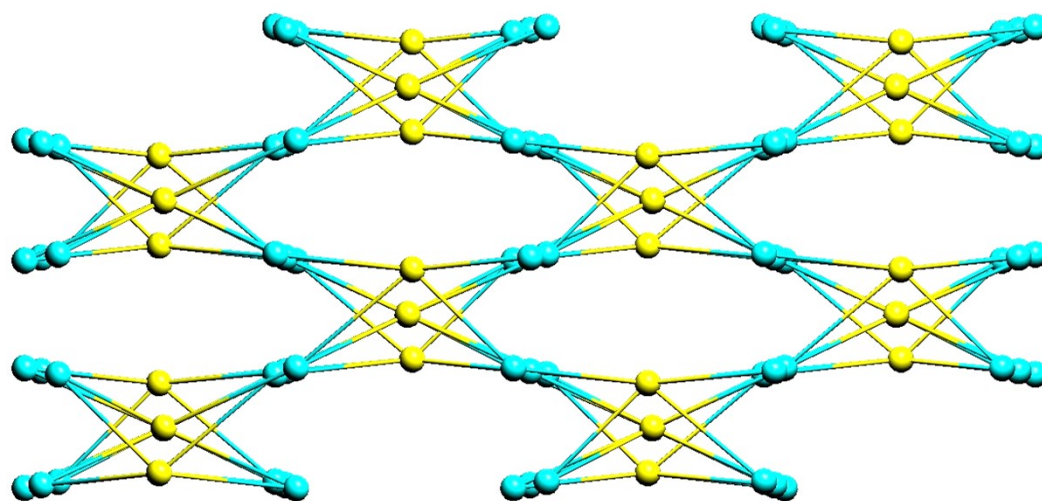

**Figure S2.** Topological representation of Ce-MOF underlying net 4,4,6,6T3. Ce (yellow)  
PDA ligand (sky blue).

**Table S1.** Bond Lengths (Å) for Ce-MOF.

| Atom | Atom             | Length/Å | Atom | Atom             | Length/Å  |
|------|------------------|----------|------|------------------|-----------|
| Ce1  | O5               | 2.391(3) | O13  | Ce2 <sup>6</sup> | 2.514(3)  |
| Ce1  | O7               | 2.426(3) | O11  | Ce1 <sup>5</sup> | 2.477(3)  |
| Ce1  | O4               | 2.434(3) | O13  | Ce1 <sup>2</sup> | 2.682(3)  |
| Ce1  | O11 <sup>1</sup> | 2.477(3) | O3   | Ce2 <sup>1</sup> | 2.583(4)  |
| Ce1  | O12 <sup>2</sup> | 2.517(3) | O2   | Ce2 <sup>3</sup> | 2.524(3)  |
| Ce1  | O1 <sup>3</sup>  | 2.522(3) | O2   | Ce1 <sup>3</sup> | 2.704(3)  |
| Ce1  | O10 <sup>1</sup> | 2.655(3) | C25  | Ce1 <sup>2</sup> | 2.982(4)  |
| Ce1  | O13 <sup>2</sup> | 2.683(3) | O12  | Ce1 <sup>2</sup> | 2.517(3)  |
| Ce1  | O2 <sup>3</sup>  | 2.704(3) | C8   | Ce1 <sup>3</sup> | 3.002(5)  |
| Ce1  | C26 <sup>1</sup> | 2.944(5) | C26  | C27              | 1.504(6)  |
| Ce1  | C25 <sup>2</sup> | 2.982(4) | C26  | Ce1 <sup>5</sup> | 2.944(5)  |
| Ce1  | C8 <sup>3</sup>  | 3.002(5) | O10  | Ce1 <sup>5</sup> | 2.655(3)  |
| Ce2  | O9               | 2.457(4) | O4   | Ce2 <sup>1</sup> | 2.625(3)  |
| Ce2  | O10              | 2.477(3) | O1   | Ce1 <sup>3</sup> | 2.522(3)  |
| Ce2  | O6               | 2.478(3) | Ce2  | C10 <sup>5</sup> | 3.003(5)  |
| Ce2  | O13 <sup>4</sup> | 2.514(3) | Ce2  | Ce1 <sup>5</sup> | 3.9626(4) |
| Ce2  | O2 <sup>3</sup>  | 2.524(3) | C10  | Ce2 <sup>1</sup> | 3.003(5)  |
| Ce2  | O7               | 2.547(3) | Ce2  | O4 <sup>5</sup>  | 2.625(3)  |
| Ce2  | O3 <sup>5</sup>  | 2.583(4) | Ce2  | C16              | 2.972(5)  |
| Ce2  | O8               | 2.593(4) |      |                  |           |

<sup>1</sup>+X,1/2-Y,1/2+Z; <sup>2</sup>-X,1-Y,1-Z; <sup>3</sup>1-X,-Y,1-Z; <sup>4</sup>-X,-1/2+Y,1/2-Z; <sup>5</sup>+X,1/2-Y,-1/2+Z; <sup>6</sup>-X,1/2+Y,1/2-Z; <sup>7</sup>-X,1-Y,-Z; <sup>8</sup>1-X,1-Y,1-Z

**Table S2.** Bond Angles (°) for Ce-MOF.

| Atom             | Atom | Atom             | Angle/°    | Atom             | Atom | Atom             | Angle/°    |
|------------------|------|------------------|------------|------------------|------|------------------|------------|
| O5               | Ce1  | O7               | 86.49(12)  | O10              | Ce2  | C10 <sup>5</sup> | 77.72(12)  |
| O5               | Ce1  | O4               | 81.48(12)  | O6               | Ce2  | C10 <sup>5</sup> | 97.74(13)  |
| O7               | Ce1  | O4               | 166.56(11) | O13 <sup>4</sup> | Ce2  | C10 <sup>5</sup> | 92.74(13)  |
| O5               | Ce1  | O11 <sup>1</sup> | 158.26(13) | O2 <sup>3</sup>  | Ce2  | C10 <sup>5</sup> | 82.94(13)  |
| O7               | Ce1  | O11 <sup>1</sup> | 76.77(11)  | O7               | Ce2  | C10 <sup>5</sup> | 151.10(12) |
| O4               | Ce1  | O11 <sup>1</sup> | 116.33(11) | O3 <sup>5</sup>  | Ce2  | C10 <sup>5</sup> | 24.23(12)  |
| O5               | Ce1  | O12 <sup>2</sup> | 77.43(12)  | O8               | Ce2  | C10 <sup>5</sup> | 154.42(13) |
| O7               | Ce1  | O12 <sup>2</sup> | 72.78(11)  | O4 <sup>5</sup>  | Ce2  | C10 <sup>5</sup> | 25.32(12)  |
| O4               | Ce1  | O12 <sup>2</sup> | 110.07(11) | C16              | Ce2  | C10 <sup>5</sup> | 169.33(15) |
| O11 <sup>1</sup> | Ce1  | O12 <sup>2</sup> | 84.35(13)  | O9               | Ce2  | Ce1 <sup>5</sup> | 112.19(10) |
| O5               | Ce1  | O1 <sup>3</sup>  | 114.04(12) | O10              | Ce2  | Ce1 <sup>5</sup> | 41.12(7)   |
| O7               | Ce1  | O1 <sup>3</sup>  | 95.52(11)  | O6               | Ce2  | Ce1 <sup>5</sup> | 157.45(8)  |
| O4               | Ce1  | O1 <sup>3</sup>  | 84.03(11)  | O13 <sup>4</sup> | Ce2  | Ce1 <sup>5</sup> | 41.91(7)   |
| O11 <sup>1</sup> | Ce1  | O1 <sup>3</sup>  | 81.72(13)  | O2 <sup>3</sup>  | Ce2  | Ce1 <sup>5</sup> | 94.81(7)   |
| O12 <sup>2</sup> | Ce1  | O1 <sup>3</sup>  | 163.59(12) | O7               | Ce2  | Ce1 <sup>5</sup> | 119.03(8)  |
| O5               | Ce1  | O10 <sup>1</sup> | 146.08(11) | O3 <sup>5</sup>  | Ce2  | Ce1 <sup>5</sup> | 83.86(8)   |
| O7               | Ce1  | O10 <sup>1</sup> | 126.86(10) | O8               | Ce2  | Ce1 <sup>5</sup> | 98.78(10)  |
| O4               | Ce1  | O10 <sup>1</sup> | 65.90(10)  | O4 <sup>5</sup>  | Ce2  | Ce1 <sup>5</sup> | 36.76(6)   |
| O11 <sup>1</sup> | Ce1  | O10 <sup>1</sup> | 50.55(10)  | C16              | Ce2  | Ce1 <sup>5</sup> | 110.88(10) |
| O12 <sup>2</sup> | Ce1  | O10 <sup>1</sup> | 104.37(10) | C10 <sup>5</sup> | Ce2  | Ce1 <sup>5</sup> | 60.22(10)  |
| O1 <sup>3</sup>  | Ce1  | O10 <sup>1</sup> | 73.07(10)  | C8               | O2   | Ce2 <sup>3</sup> | 134.7(3)   |
| O5               | Ce1  | O13 <sup>2</sup> | 96.07(11)  | C8               | O2   | Ce1 <sup>3</sup> | 90.8(3)    |
| O7               | Ce1  | O13 <sup>2</sup> | 119.65(10) | Ce2 <sup>3</sup> | O2   | Ce1 <sup>3</sup> | 105.73(11) |
| O4               | Ce1  | O13 <sup>2</sup> | 67.94(10)  | C25              | O13  | Ce2 <sup>6</sup> | 167.1(3)   |
| O11 <sup>1</sup> | Ce1  | O13 <sup>2</sup> | 80.70(12)  | C25              | O13  | Ce1 <sup>2</sup> | 90.5(3)    |
| O12 <sup>2</sup> | Ce1  | O13 <sup>2</sup> | 49.67(10)  | Ce2 <sup>6</sup> | O13  | Ce1 <sup>2</sup> | 99.34(11)  |
| O1 <sup>3</sup>  | Ce1  | O13 <sup>2</sup> | 135.26(10) | C25              | O12  | Ce1 <sup>2</sup> | 99.0(3)    |

|                  |     |                  |            |                 |     |                  |            |
|------------------|-----|------------------|------------|-----------------|-----|------------------|------------|
| O10 <sup>1</sup> | Ce1 | O13 <sup>2</sup> | 63.99(10)  | C26             | O10 | Ce2              | 136.5(3)   |
| O5               | Ce1 | O2 <sup>3</sup>  | 72.46(11)  | C26             | O10 | Ce1 <sup>5</sup> | 90.0(3)    |
| O7               | Ce1 | O2 <sup>3</sup>  | 67.05(10)  | Ce2             | O10 | Ce1 <sup>5</sup> | 101.04(11) |
| O4               | Ce1 | O2 <sup>3</sup>  | 103.32(10) | C10             | O4  | Ce1              | 148.0(3)   |
| O11 <sup>1</sup> | Ce1 | O2 <sup>3</sup>  | 112.32(11) | C10             | O4  | Ce2 <sup>1</sup> | 94.0(3)    |
| O12 <sup>2</sup> | Ce1 | O2 <sup>3</sup>  | 130.47(10) | Ce1             | O4  | Ce2 <sup>1</sup> | 103.04(11) |
| O1 <sup>3</sup>  | Ce1 | O2 <sup>3</sup>  | 49.46(10)  | C16             | O7  | Ce1              | 150.1(3)   |
| O10 <sup>1</sup> | Ce1 | O2 <sup>3</sup>  | 122.53(9)  | C16             | O7  | Ce2              | 96.0(3)    |
| O13 <sup>2</sup> | Ce1 | O2 <sup>3</sup>  | 166.89(11) | Ce1             | O7  | Ce2              | 113.90(12) |
| O5               | Ce1 | C26 <sup>1</sup> | 166.62(12) | C8              | O1  | Ce1 <sup>3</sup> | 99.6(3)    |
| O7               | Ce1 | C26 <sup>1</sup> | 101.48(12) | C11             | O5  | Ce1              | 139.0(3)   |
| O4               | Ce1 | C26 <sup>1</sup> | 91.48(12)  | C11             | O6  | Ce2              | 139.4(3)   |
| O11 <sup>1</sup> | Ce1 | C26 <sup>1</sup> | 24.90(12)  | C26             | O11 | Ce1 <sup>5</sup> | 98.9(3)    |
| O12 <sup>2</sup> | Ce1 | C26 <sup>1</sup> | 94.52(12)  | C10             | O3  | Ce2 <sup>1</sup> | 97.2(3)    |
| O1 <sup>3</sup>  | Ce1 | C26 <sup>1</sup> | 76.21(12)  | C16             | O8  | Ce2              | 95.2(3)    |
| O10 <sup>1</sup> | Ce1 | C26 <sup>1</sup> | 25.65(11)  | O12             | C25 | O13              | 119.5(4)   |
| O13 <sup>2</sup> | Ce1 | C26 <sup>1</sup> | 70.68(11)  | O12             | C25 | C24              | 119.9(4)   |
| O2 <sup>3</sup>  | Ce1 | C26 <sup>1</sup> | 120.47(11) | O13             | C25 | C24              | 120.6(4)   |
| O5               | Ce1 | C25 <sup>2</sup> | 88.90(13)  | O12             | C25 | Ce1 <sup>2</sup> | 56.5(2)    |
| O7               | Ce1 | C25 <sup>2</sup> | 94.96(11)  | O13             | C25 | Ce1 <sup>2</sup> | 64.1(2)    |
| O4               | Ce1 | C25 <sup>2</sup> | 90.80(11)  | C24             | C25 | Ce1 <sup>2</sup> | 170.3(3)   |
| O11 <sup>1</sup> | Ce1 | C25 <sup>2</sup> | 78.98(13)  | O1              | C8  | O2               | 120.2(4)   |
| O12 <sup>2</sup> | Ce1 | C25 <sup>2</sup> | 24.56(12)  | O1              | C8  | C7               | 119.0(4)   |
| O1 <sup>3</sup>  | Ce1 | C25 <sup>2</sup> | 155.27(12) | O2              | C8  | C7               | 120.7(4)   |
| O10 <sup>1</sup> | Ce1 | C25 <sup>2</sup> | 82.73(12)  | O1              | C8  | Ce1 <sup>3</sup> | 55.9(2)    |
| O13 <sup>2</sup> | Ce1 | C25 <sup>2</sup> | 25.41(11)  | O2              | C8  | Ce1 <sup>3</sup> | 64.2(2)    |
| O2 <sup>3</sup>  | Ce1 | C25 <sup>2</sup> | 154.32(11) | C7              | C8  | Ce1 <sup>3</sup> | 174.1(3)   |
| C26 <sup>1</sup> | Ce1 | C25 <sup>2</sup> | 79.78(13)  | O2 <sup>3</sup> | Ce2 | O4 <sup>5</sup>  | 79.89(10)  |
| O5               | Ce1 | C8 <sup>3</sup>  | 93.53(13)  | O7              | Ce2 | O4 <sup>5</sup>  | 138.59(11) |
| O7               | Ce1 | C8 <sup>3</sup>  | 80.87(12)  | O3 <sup>5</sup> | Ce2 | O4 <sup>5</sup>  | 49.51(10)  |

|                  |     |                  |            |                  |     |                  |            |
|------------------|-----|------------------|------------|------------------|-----|------------------|------------|
| O4               | Ce1 | C8 <sup>3</sup>  | 93.85(11)  | O11              | C26 | Ce1 <sup>5</sup> | 56.2(2)    |
| O11 <sup>1</sup> | Ce1 | C8 <sup>3</sup>  | 97.33(13)  | O10              | C26 | Ce1 <sup>5</sup> | 64.4(2)    |
| O12 <sup>2</sup> | Ce1 | C8 <sup>3</sup>  | 152.51(12) | C27              | C26 | Ce1 <sup>5</sup> | 176.3(3)   |
| O1 <sup>3</sup>  | Ce1 | C8 <sup>3</sup>  | 24.48(12)  | O8               | Ce2 | O4 <sup>5</sup>  | 135.49(12) |
| O10 <sup>1</sup> | Ce1 | C8 <sup>3</sup>  | 97.55(12)  | O9               | Ce2 | C16              | 92.13(15)  |
| O13 <sup>2</sup> | Ce1 | C8 <sup>3</sup>  | 157.77(12) | O10              | Ce2 | C16              | 99.36(12)  |
| O2 <sup>3</sup>  | Ce1 | C8 <sup>3</sup>  | 24.98(11)  | O8               | C16 | Ce2              | 60.3(3)    |
| C26 <sup>1</sup> | Ce1 | C8 <sup>3</sup>  | 98.31(13)  | O7               | C16 | Ce2              | 58.5(2)    |
| C25 <sup>2</sup> | Ce1 | C8 <sup>3</sup>  | 175.02(12) | C17              | C16 | Ce2              | 176.3(3)   |
| O9               | Ce2 | O10              | 73.59(12)  | O6               | Ce2 | C16              | 90.46(13)  |
| O9               | Ce2 | O6               | 72.69(13)  | O13 <sup>4</sup> | Ce2 | C16              | 76.68(13)  |
| O10              | Ce2 | O6               | 145.15(11) | O2 <sup>3</sup>  | Ce2 | C16              | 92.43(12)  |
| O9               | Ce2 | O13 <sup>4</sup> | 138.33(13) | O7               | Ce2 | C16              | 25.53(12)  |
| O10              | Ce2 | O13 <sup>4</sup> | 69.04(11)  | O3 <sup>5</sup>  | Ce2 | C16              | 165.23(13) |
| O6               | Ce2 | O13 <sup>4</sup> | 145.70(11) | O3               | C10 | Ce2 <sup>1</sup> | 58.6(3)    |
| O9               | Ce2 | O2 <sup>3</sup>  | 148.84(12) | O4               | C10 | Ce2 <sup>1</sup> | 60.7(2)    |
| O10              | Ce2 | O2 <sup>3</sup>  | 135.68(10) | C9               | C10 | Ce2 <sup>1</sup> | 174.5(4)   |
| O6               | Ce2 | O2 <sup>3</sup>  | 76.46(11)  | O8               | Ce2 | C16              | 24.51(12)  |
| O13 <sup>4</sup> | Ce2 | O2 <sup>3</sup>  | 72.55(11)  | O4 <sup>5</sup>  | Ce2 | C16              | 144.33(12) |
| O9               | Ce2 | O7               | 108.52(14) | O9               | Ce2 | C10 <sup>5</sup> | 96.81(16)  |
| O10              | Ce2 | O7               | 122.15(10) | O7               | Ce2 | O8               | 50.03(10)  |
| O6               | Ce2 | O7               | 77.45(11)  | O3 <sup>5</sup>  | Ce2 | O8               | 158.80(15) |
| O13 <sup>4</sup> | Ce2 | O7               | 77.71(11)  | O9               | Ce2 | O4 <sup>5</sup>  | 112.38(13) |
| O2 <sup>3</sup>  | Ce2 | O7               | 68.19(10)  | O10              | Ce2 | O4 <sup>5</sup>  | 65.81(10)  |
| O9               | Ce2 | O3 <sup>5</sup>  | 82.63(15)  | O6               | Ce2 | O4 <sup>5</sup>  | 120.69(11) |
| O10              | Ce2 | O3 <sup>5</sup>  | 92.42(12)  | O13 <sup>4</sup> | Ce2 | O4 <sup>5</sup>  | 67.76(10)  |
| O6               | Ce2 | O3 <sup>5</sup>  | 74.80(11)  | O6               | Ce2 | O8               | 103.76(13) |
| O13 <sup>4</sup> | Ce2 | O3 <sup>5</sup>  | 116.20(11) | O13 <sup>4</sup> | Ce2 | O8               | 77.22(14)  |
| O2 <sup>3</sup>  | Ce2 | O3 <sup>5</sup>  | 85.22(13)  | O2 <sup>3</sup>  | Ce2 | O8               | 115.31(12) |
| O7               | Ce2 | O3 <sup>5</sup>  | 145.27(12) | O10              | Ce2 | O8               | 76.72(11)  |



|    |     |    |           |  |  |  |  |
|----|-----|----|-----------|--|--|--|--|
| O9 | Ce2 | O8 | 76.89(16) |  |  |  |  |
|----|-----|----|-----------|--|--|--|--|

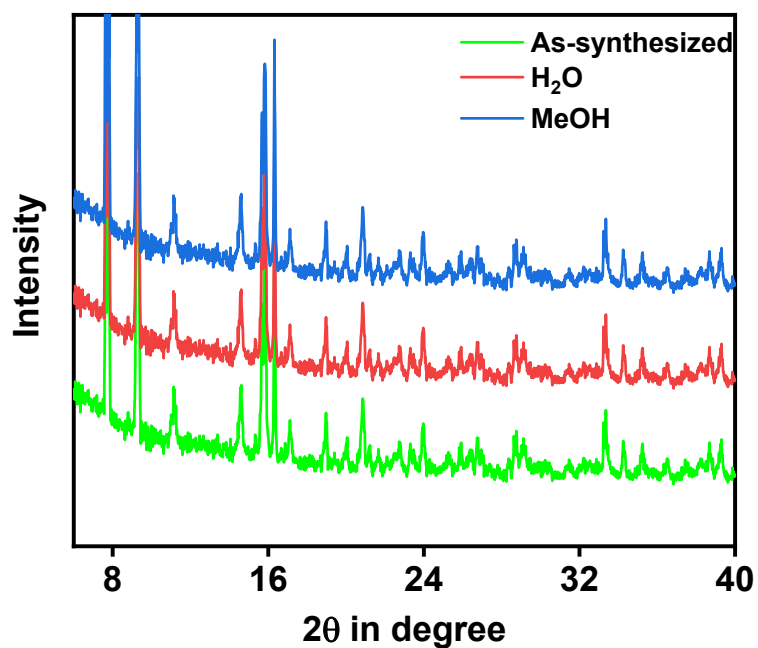

**Figure S3.** PXRD pattern of Ce-MOF at different solvent medium (soaked for 24 h).

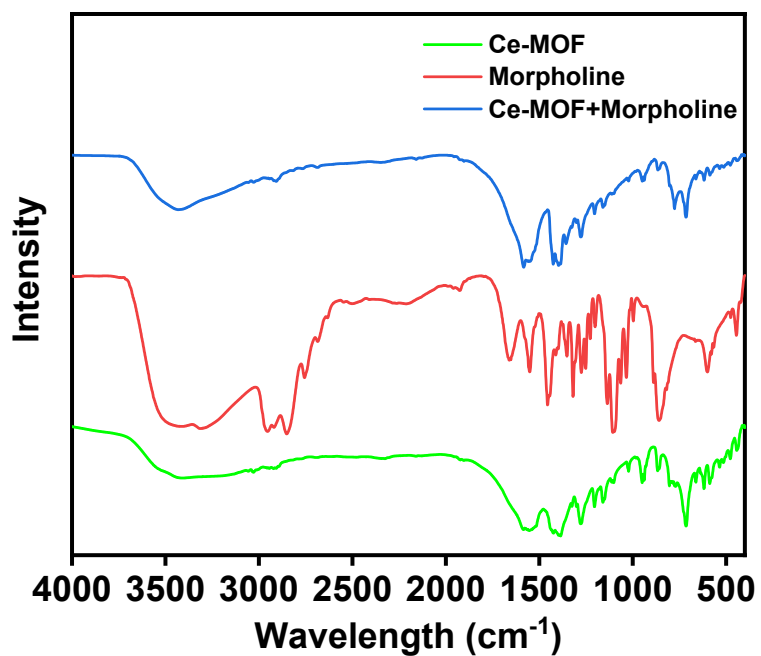

**Figure S4.** FT-IR of Ce-MOF (without N-Methylmorpholine), N-Methylmorpholine and Ce-MOF (with N-Methylmorpholine) at different solvent medium (soaked for 24 h).

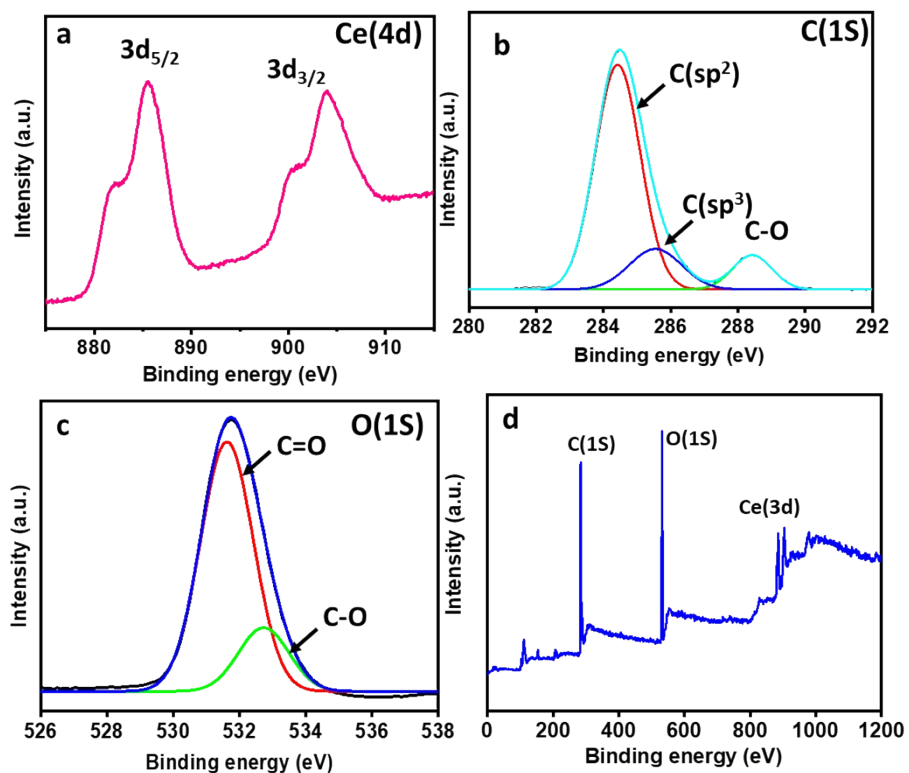

Figure S5. XPS analysis of Ce-MOF.

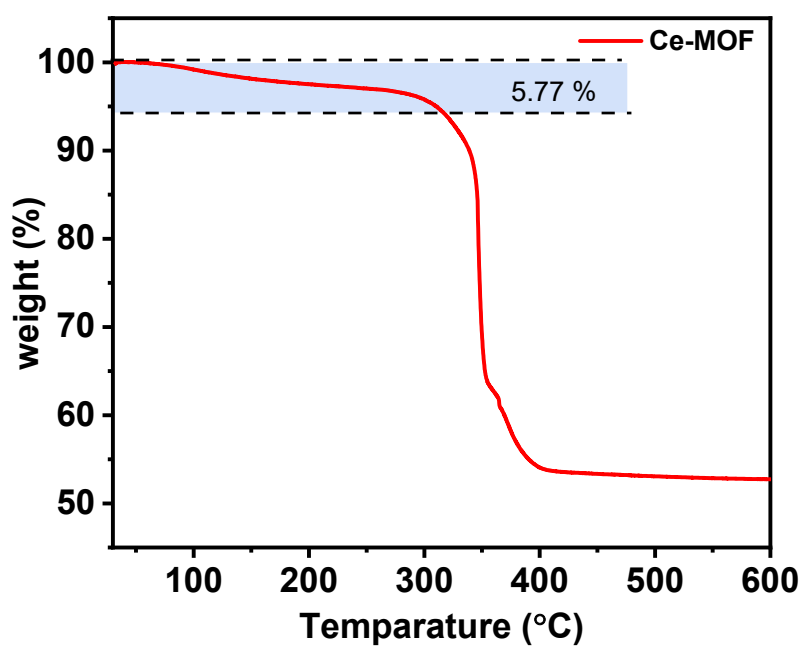

Figure S6. TGA plot of Ce-MOF.

### Calculation for weight loss of Ce-MOF:

Formula of asymmetric unit =  $C_{30}H_{26}Ce_2O_{13} \cdot 2(H_2O)$

Therefore, FW of asymmetric unit = 910 g/mol.

Weight loss for the loss of coordinated and lattice  $H_2O$  molecules =  $(54/910) \times 100\% = 5.93\%$  (experimental 5.77 %). The further weight loss may be ascribed to the collapse of some additional portion of the polymeric unit of Ce-MOF.

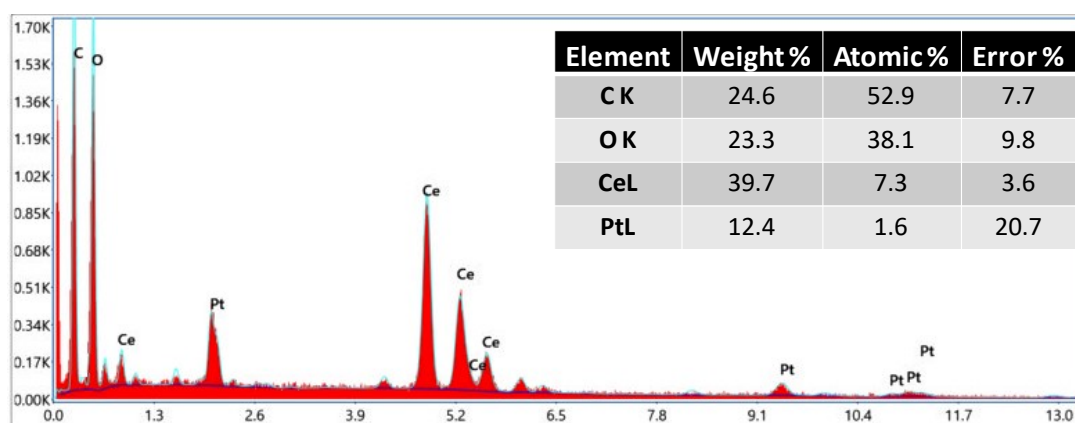

**Figure S7.** Energy dispersive X-ray (EDX) spectrum of Ce-MOF, inset shows the elemental percentage.

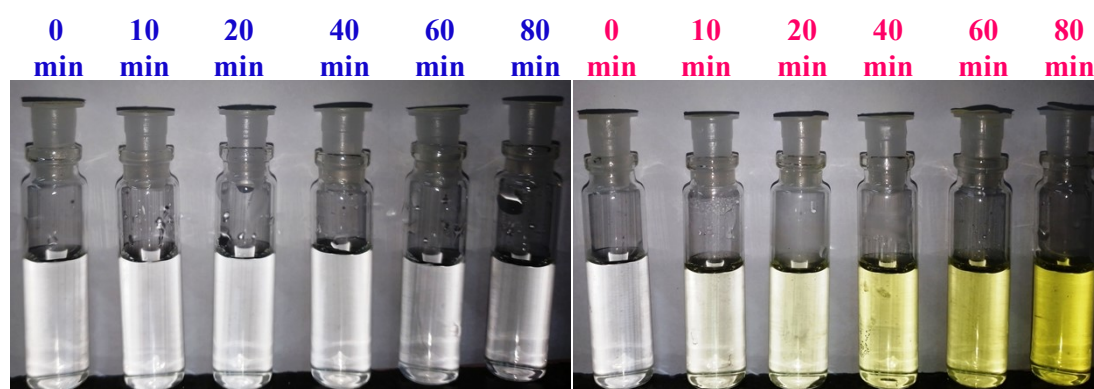

(a)

(b)

**Figure S8.** Color change of 4-NPP hydrolysis reaction over time (a) without catalyst, (b) with catalyst of Ce-MOF.

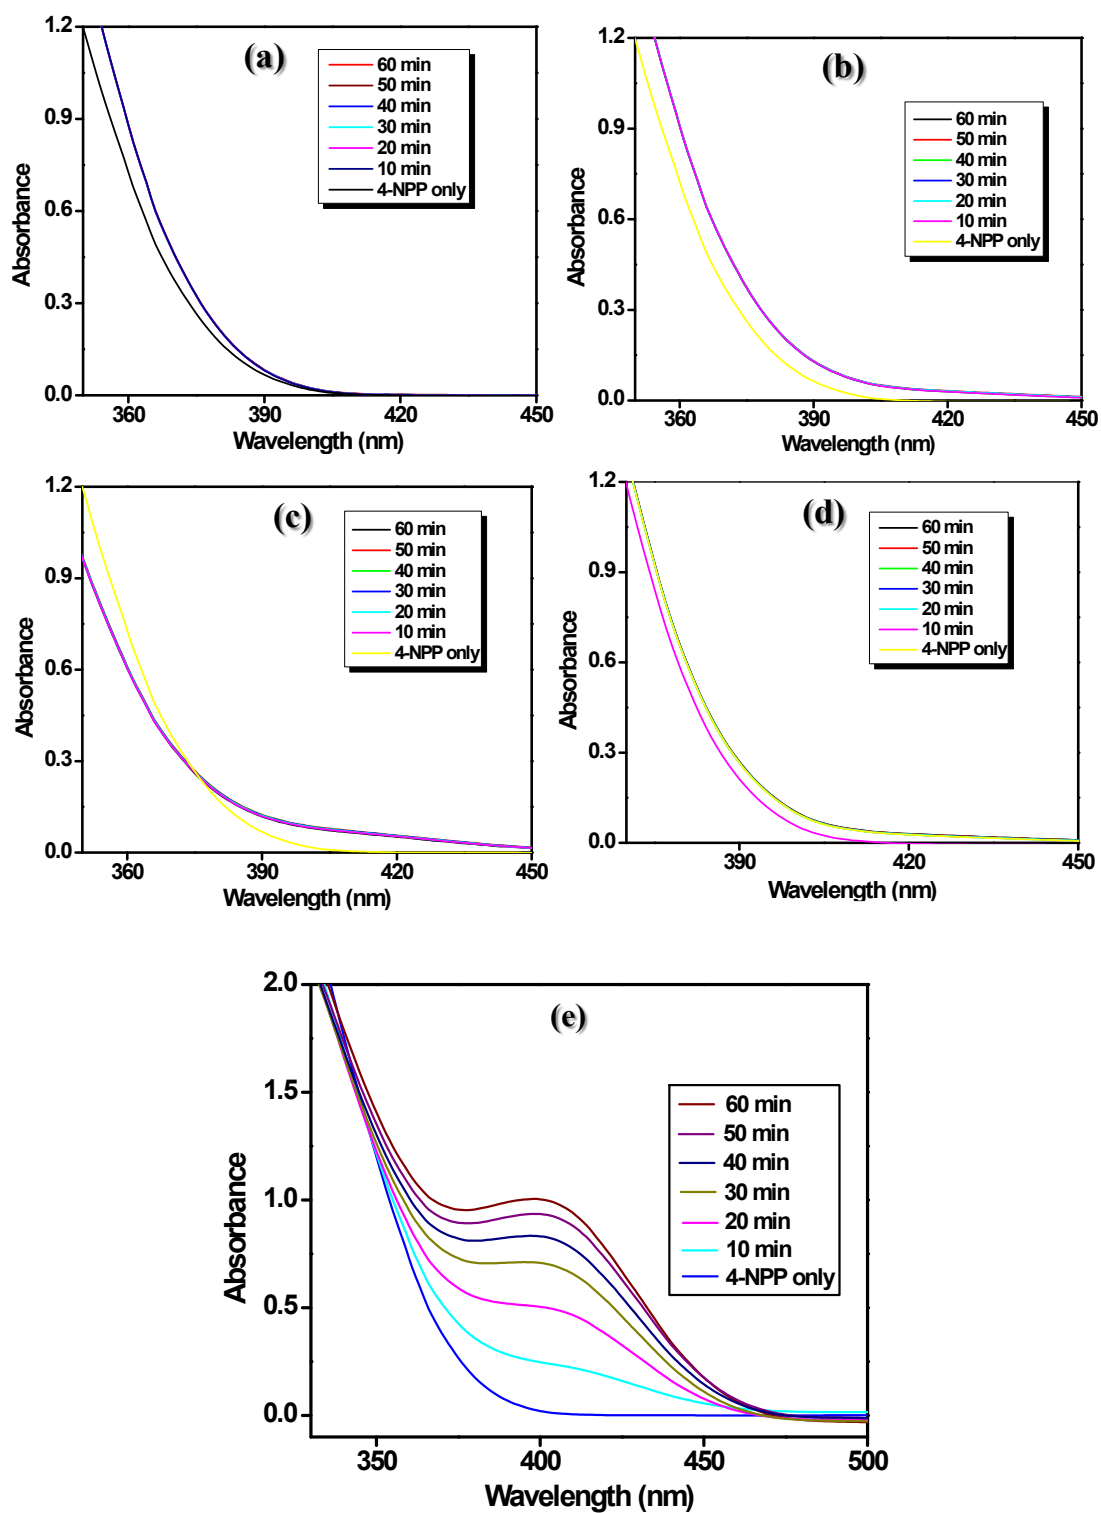

**Figure S9.** Wavelength scan for the hydrolysis of 4-NPP in the presence of Ce-MOF in (a)  $\text{H}_2\text{O}$ , (b) HEPES buffer (pH 9.0), (c) Tris-HCl buffer (pH 9.0), (d) carbonate buffer (pH 9.0), (e) N-Methylmorpholine buffer (pH 9.0), recorded at 25 °C at intervals of 10 min.

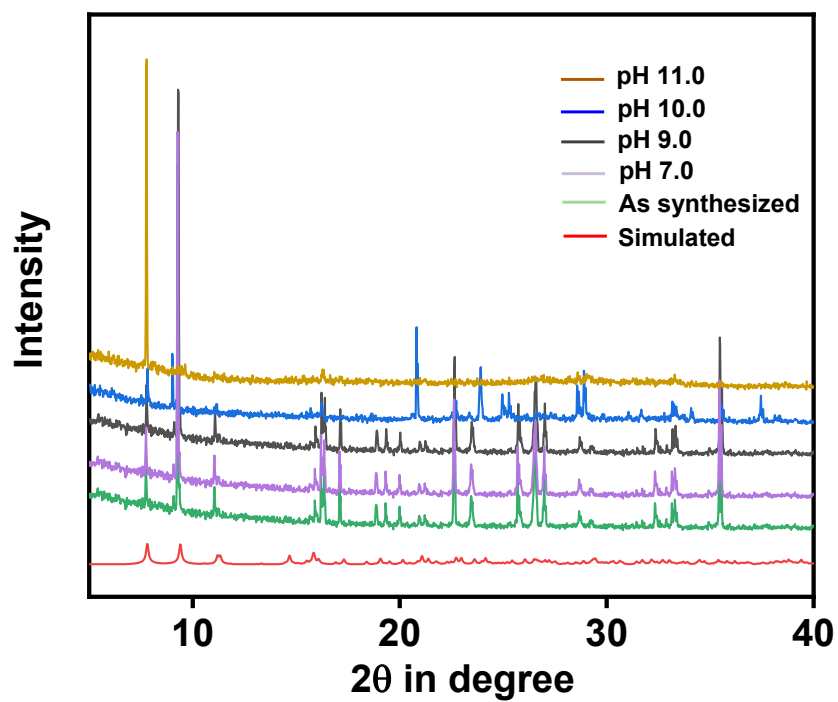

Figure S10. PXRD pattern of Ce-MOF at different pH.

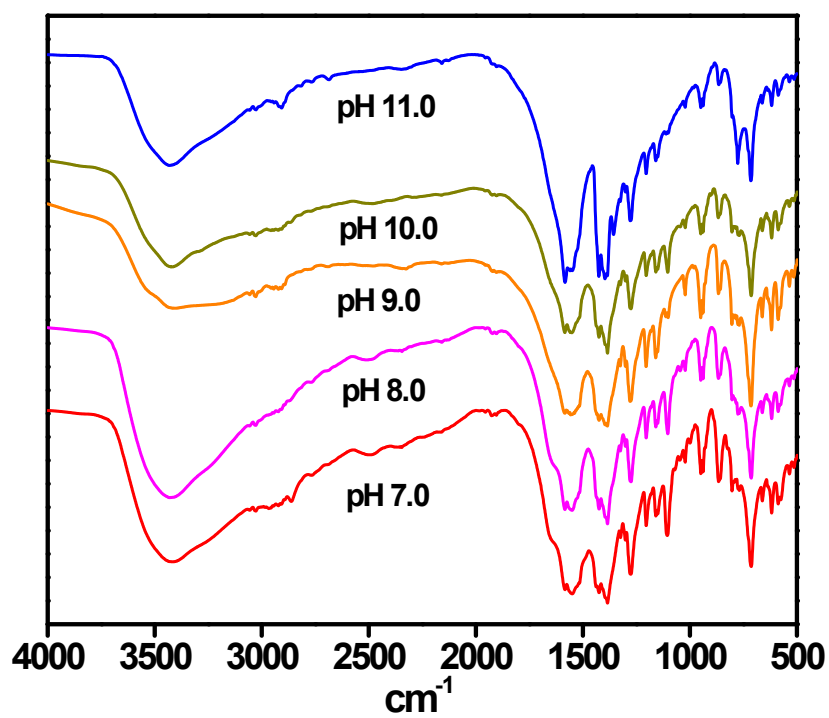

Figure S11. FT-IR spectra of Ce-MOF in different pH medium (N-Methylmorpholine buffered 7.0-11.0).

**Table S3.** Comparison of hydrolysis rate of p-NPP with various catalysts.

| Catalyst                                             | Rate (mM/min <sup>-1</sup> ) |
|------------------------------------------------------|------------------------------|
| Ce-MOF                                               | 7.42                         |
| Ce(NO <sub>3</sub> ) <sub>2</sub> ·6H <sub>2</sub> O | 1.55                         |
| PDA                                                  | 0                            |

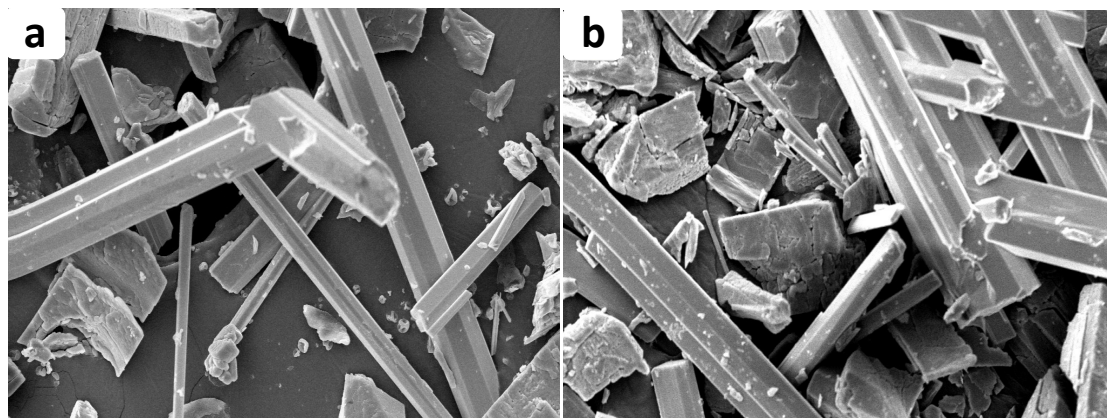

**Figure S12.** SEM images of Ce-MOF (a) before and (b) after catalysis.

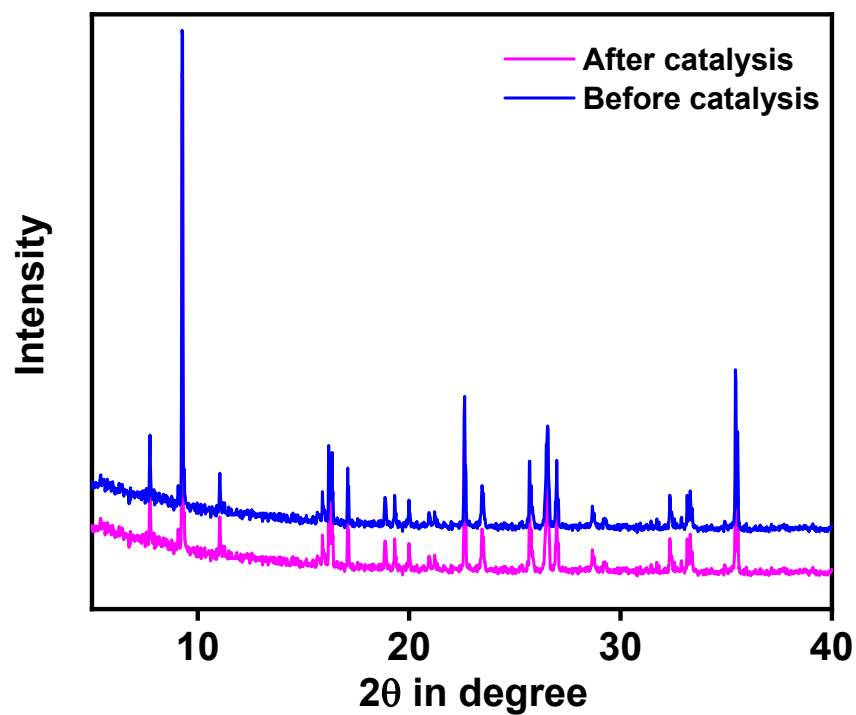

**Figure S13.** PXRD of Ce-MOF after and before catalysis.

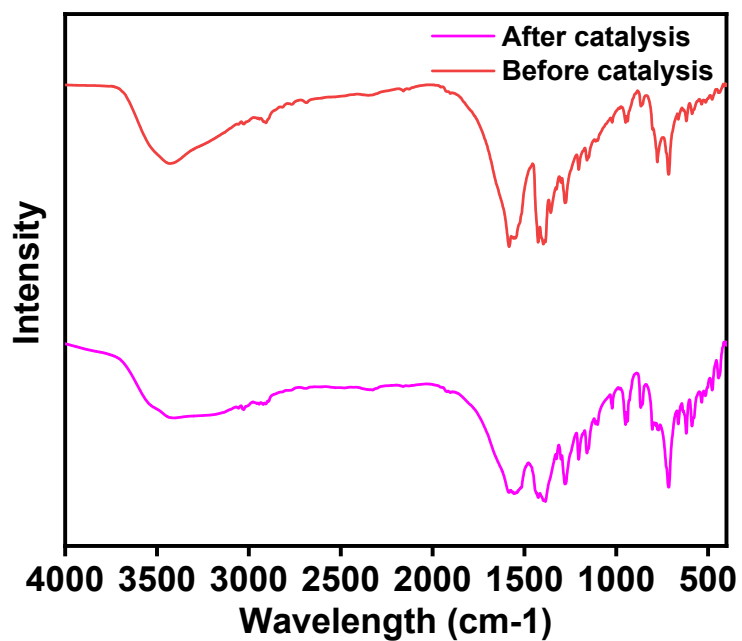

Figure S14. FT-IR of Ce-MOF after and before catalysis.

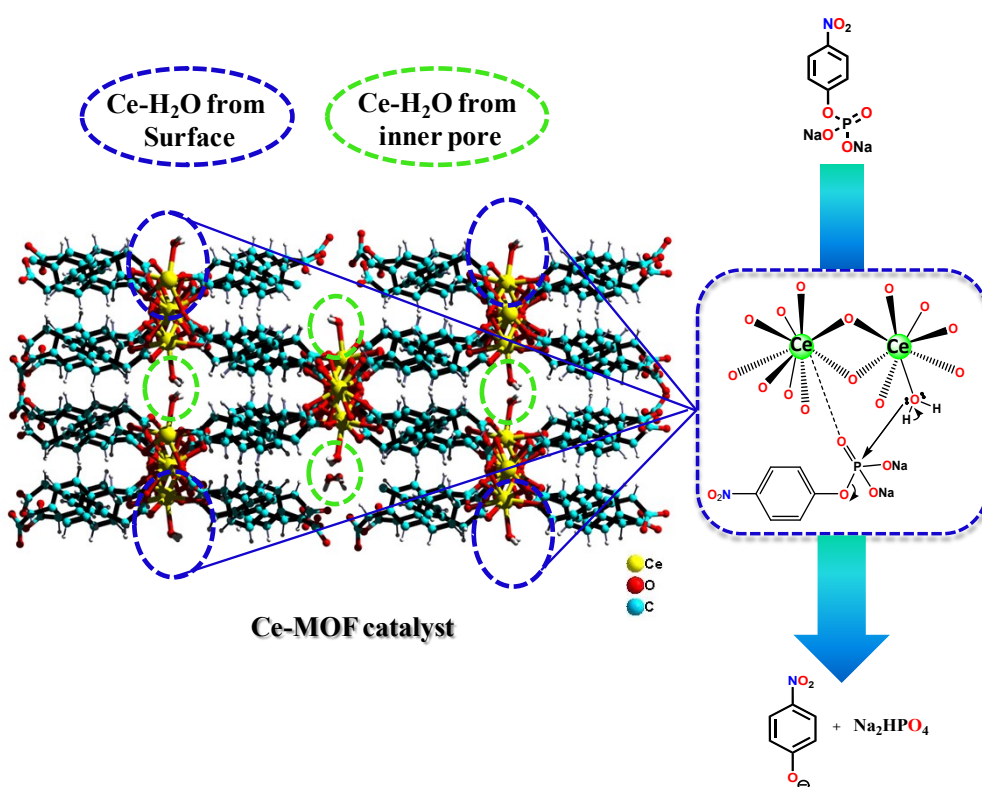

Figure S15. A pictorial diagram of the 4-NPP catalytic hydrolytic reaction with the surface  $\text{H}_2\text{O}$  molecules of the Ce-MOF catalyst.

**Table S4.** Previously reported  $K_{cat}$  values for the hydrolysis of 4-NPP by different catalysts.

| Catalyst                     | Substrate    | Solvent                                   | $k_{cat}(\text{min}^{-1})$              | Ref.             |
|------------------------------|--------------|-------------------------------------------|-----------------------------------------|------------------|
| Hf-Ni                        | 4-NPP        | HEPES buffer (pH 7.4)                     | $8.34 \times 10^{-3}$                   | <b>1</b>         |
| CeNPs                        | 4-NPP        | HEPES buffer (pH 7.0)                     | $2.20 \times 10^{-6}$                   | <b>2</b>         |
| Protein Tyrosine Phosphatase | 4-NPP        | HEPES buffer (pH 7.0)                     | $2.05 \times 10^3$                      | <b>3</b>         |
| CeCDs                        | BNPP         | Tris-HCl buffer (pH 8.5)                  | $1.84 \times 10^{-3}$                   | <b>4</b>         |
| <b>Ce-MOF</b>                | <b>4-NPP</b> | <b>N-Methylmorpholine buffer (pH 9.0)</b> | <b><math>7.42 \times 10^{-3}</math></b> | <b>This work</b> |

## REFERENCES

1. Dong, J.; An, H. D.; Yue, Z. K.; Hou, S. L.; Chen, Y.; Zhang, Z. J.; & Zhao, B. Dual-Selective Catalysis in Dephosphorylation Tuned by Hf6-Containing Metal–Organic Frameworks Mimicking Phosphatase. *ACS Cent. Sci.*, 2021, **7**, 831-840.
2. Dhall, A.; Burns, A.; Dowding, J.; Das, S.; Seal, S.; and Self, W. Characterizing the phosphatase mimetic activity of cerium oxide nanoparticles and distinguishing its active site from that for catalase mimetic activity using anionic inhibitors. *Environ. Sci. Nano* 2017, **4**, 1742-1749.
3. Wang, S.; Taberner, L.; Zhang, M.; Harms, E.; Van Etten, R. L.; and Stauffacher, C. V. Crystal structures of a low-molecular weight protein tyrosine phosphatase from *Saccharomyces cerevisiae* and its complex with the substrate p-nitrophenyl phosphate. *Biochem.*, 2000, **39**, 1903-1914.
4. Du, J.; Qi, S.; Chen, J.; Yang, Y.; Fan, T.; Zhang, P.; and Zhu, C. Fabrication of highly active phosphatase-like fluorescent cerium-doped carbon dots for in situ monitoring the hydrolysis of phosphate diesters. *RSC Adv.*, 2020, **10**, 41551-41559.
